# Supplementary material for: Genetic polymorphisms and forensic efficiency of 19 X-chromosomal STR loci for Xinjiang Mongolian population
Source: PeerJ. 2018 Jul 3;6:e5117. doi: 10.7717/peerj.5117 (PMC6034600; doi:10.7717/peerj.5117)
Supplement: Supplemental Information 3 [file peerj-06-5117-s003.xlsx]

## Sheet: Sheet1
Supplementary table 3. The haplotype frequencies and haplotype diversities for seven groups of linked X-STRs in Xinjiang Mongolian males (n =156)
Group1	Frequency	Group2	Frequency	Group3	Frequency	Group4	Frequency	Group5	Frequency	Group6	Frequency	Group7	Frequency
DXS8378-DXS10148-DXS10135		DXS7132-DXS10079-DXS10075-DXS10074,		DXS10103-DXS10101-HPRTB		DXS6809-DXS6789		DXS10159-DXS10162-DXS10164		DXS7424-DXS101		DXS10134-DXS7423
10-25.1-21	0.025641	14-20-17-15	0.0384615	19-30.2-12	0.0448718	33-20	0.108974	24-18-10	0.0833333	16-24	0.108974	37-15	0.102564
10-24.1-20	0.0192308	12-19-18-18	0.025641	16-32-13	0.0384615	33-21	0.0833333	26-18-10	0.0641026	15-26	0.0769231	35-15	0.0961538
10-27.1-20	0.0192308	13-20-18-19	0.025641	16-31-13	0.0320513	34-16	0.0833333	27-18-10	0.0576923	16-23	0.0705128	35-14	0.0833333
10-28.1-23	0.0192308	14-19-18-17	0.025641	19-30.2-13	0.0320513	31-20	0.0512821	25-18-10	0.0512821	16-26	0.0705128	36-15	0.0833333
11-28.1-19	0.0192308	13-21-17-17	0.0192308	19-32.2-14	0.0320513	33-22	0.0512821	24-19-11	0.0448718	15-24	0.0512821	36-14	0.0769231
12-20-20	0.0192308	14-16-18-18	0.0192308	16-31-12	0.025641	35-20	0.0512821	24-18-11	0.0384615	16-27	0.0512821	34-15	0.0641026
10-18-20	0.0128205	14-19-17-18	0.0192308	19-29.2-13	0.025641	32-20	0.0448718	24-19-10	0.0384615	13-24	0.0384615	39-15	0.0512821
10-23.1-21.1	0.0128205	14-21-18-18	0.0192308	16-32-12	0.0192308	32-21	0.0448718	25-19-10	0.0384615	16-22	0.0384615	34-14	0.0448718
10-25.1-25	0.0128205	15-20-17-17	0.0192308	16-33-13	0.0192308	33-16	0.0448718	25-18-11	0.0320513	16-25	0.0384615	33-15	0.0384615
10-25.1-28	0.0128205	13-19-17-16	0.0128205	17-32-14	0.0192308	34-21	0.0384615	26-17-11	0.0320513	14-23	0.0320513	37-14	0.0384615
10-27.1-18	0.0128205	14-17-16-17	0.0128205	17-33-12	0.0192308	31-21	0.0320513	25-18-12	0.025641	14-26	0.0320513	36-16	0.0320513
10-27.2-28	0.0128205	14-17-18-17	0.0128205	18-30-13	0.0192308	32-15	0.0320513	25-19-11	0.025641	17-24	0.0320513	37-16	0.0320513
10-28.1-24	0.0128205	14-20-17-18	0.0128205	19-30.2-15	0.0192308	33-19	0.0320513	25-20-10	0.025641	17-26	0.025641	37.3-15	0.025641
10-28.2-21	0.0128205	14-23-18-17	0.0128205	19-31-13	0.0192308	32-16	0.025641	26-17-10	0.025641	13-23	0.0192308	38-15	0.025641
11-18-19	0.0128205	15-16-18-16	0.0128205	19-31.2-14	0.0192308	34-20	0.0192308	26-18-11	0.025641	14-25	0.0192308	39.3-15	0.025641
11-21.1-20	0.0128205	15-16-18-17	0.0128205	15-32-13	0.0128205	34-22	0.0192308	27-19-10	0.025641	14-27	0.0192308	37.3-16	0.0192308
11-26.1-19	0.0128205	15-17-17-16	0.0128205	15-33-13	0.0128205	30-19	0.0128205	23-17-10	0.0192308	14-32	0.0192308	38-16	0.0192308
11-27.1-32	0.0128205	15-19-17-18	0.0128205	16-30-13	0.0128205	31-19	0.0128205	23-18-10	0.0192308	15-25	0.0192308	32-15	0.0128205
12-18-19	0.0128205	15-20-17-15	0.0128205	16-30-14	0.0128205	32-22	0.0128205	24-17-9	0.0192308	16-28	0.0192308	33-14	0.0128205
12-18-20	0.0128205	15-20-17.2-17	0.0128205	17-28-12	0.0128205	32-23	0.0128205	24-20-10	0.0192308	16-29	0.0192308	38-14	0.0128205
12-18-22	0.0128205	15-20-18-15	0.0128205	18-26.2-12	0.0128205	33-17	0.0128205	25-17-12	0.0192308	12-25	0.0128205	39-14	0.0128205
12-18-28	0.0128205	15-21-17-16	0.0128205	18-29.2-12	0.0128205	34-15	0.0128205	26-19-10	0.0192308	13-25	0.0128205	42.3-14	0.0128205
9-18-23	0.00641026	15-21-17.2-18	0.0128205	18-29.2-13	0.0128205	34-19	0.0128205	24-19-12	0.0128205	13-26	0.0128205	30-14	0.00641026
9-18-27	0.00641026	16-22-17-19	0.0128205	18-30-11	0.0128205	34-23	0.0128205	25-16-10	0.0128205	14-21	0.0128205	31-14	0.00641026
9-22.1-28	0.00641026	11-19-17-17	0.00641026	18-30.2-14	0.0128205	35-21	0.0128205	25-17-10	0.0128205	14-29	0.0128205	34-16	0.00641026
9-24.1-27	0.00641026	11-21-18-17	0.00641026	18-31-14	0.0128205	38-21	0.0128205	26-16-12	0.0128205	15-22	0.0128205	35-16	0.00641026
10-17-20	0.00641026	12-17-16-18	0.00641026	18-31.2-12	0.0128205	29-20	0.00641026	27-16-12	0.0128205	15-27	0.0128205	35.3-16	0.00641026
10-18-18	0.00641026	12-19-18-15	0.00641026	18-31.2-13	0.0128205	29-21	0.00641026	27-17-12	0.0128205	17-18	0.0128205	36-13	0.00641026
10-18-19	0.00641026	12-20-17-17	0.00641026	18-32-13	0.0128205	30-21	0.00641026	27-19-11	0.0128205	17-23	0.0128205	37-17	0.00641026
10-18-21	0.00641026	12-20-18-17	0.00641026	18-32.2-13	0.0128205	31-15	0.00641026	28-18-10	0.0128205	17-25	0.0128205	37.3-14	0.00641026
10-18-22	0.00641026	12-20-18-18	0.00641026	18-32.2-14	0.0128205	31-16	0.00641026	23-19-11	0.00641026	9-23	0.00641026	40.3-15	0.00641026
10-18-24	0.00641026	12-20-18-21	0.00641026	18-33.2-13	0.0128205	31-17	0.00641026	24-16-11	0.00641026	11-22	0.00641026	41.3-15	0.00641026
10-18-25	0.00641026	12-21-18-17	0.00641026	19-28-12	0.0128205	31-22	0.00641026	24-17-10	0.00641026	11-23	0.00641026	42.3-15	0.00641026
10-18-30	0.00641026	12-22-17-15	0.00641026	19-29-13	0.0128205	32-19	0.00641026	24-18-9	0.00641026	11-25	0.00641026	44.3-13	0.00641026
10-18-32	0.00641026	12-22-17-16	0.00641026	19-30-12	0.0128205	33-14	0.00641026	25-17-11	0.00641026	12-28	0.00641026
10-19-18	0.00641026	12-23-16-18	0.00641026	19-31-12	0.0128205	33-15	0.00641026	25-17-14	0.00641026	14-24	0.00641026
10-19-24	0.00641026	13-17-16-16	0.00641026	19-31.2-13	0.0128205	33-23	0.00641026	25-18-9	0.00641026	14-28	0.00641026
10-19.1-21	0.00641026	13-17-16-20	0.00641026	19-32.2-13	0.0128205	35-16	0.00641026	25-19-12	0.00641026	16-21	0.00641026
10-20-22	0.00641026	13-18-16-15	0.00641026	20-30.2-14	0.0128205	35-22	0.00641026	25-22-10	0.00641026	17-28	0.00641026
10-20-23	0.00641026	13-18-16-17	0.00641026	20-31.2-14	0.0128205	35-23	0.00641026	25-22-11	0.00641026	18-24	0.00641026
10-21-21	0.00641026	13-18-16-19	0.00641026	20-32-13	0.0128205	36-20	0.00641026	26-17-12	0.00641026	18-26	0.00641026
10-21.1-21	0.00641026	13-19-17-17	0.00641026	21-29.2-13	0.0128205	36-21	0.00641026	26-18-12	0.00641026
10-22.1-22	0.00641026	13-19-18-18	0.00641026	15-31-14	0.00641026	37-22	0.00641026	26-19-11	0.00641026
10-22.1-23	0.00641026	13-19-18-19	0.00641026	15-32-14	0.00641026			26-19-9	0.00641026
10-22.1-26	0.00641026	13-20-16-15	0.00641026	15-35-13	0.00641026			26-20-10	0.00641026
10-23.1-16	0.00641026	13-20-17-12	0.00641026	16-28-15	0.00641026			26-20-11	0.00641026
10-23.1-21	0.00641026	13-20-17-15	0.00641026	16-29-14	0.00641026			27-17-11	0.00641026
10-23.1-26	0.00641026	13-20-17-16	0.00641026	16-30-11	0.00641026			27-18-11	0.00641026
10-24.1-17	0.00641026	13-20-17-17	0.00641026	16-31.2-14	0.00641026			27-19-12	0.00641026
10-24.1-22	0.00641026	13-20-17-18	0.00641026	16-32-15	0.00641026			28-17-11	0.00641026
10-24.1-23	0.00641026	13-20-18-15	0.00641026	16-33-11	0.00641026			28-19-10	0.00641026
10-24.1-24	0.00641026	13-20-18-16	0.00641026	17-28-14	0.00641026			28-20-11	0.00641026
10-24.1-26	0.00641026	13-20-18-17	0.00641026	17-29-12	0.00641026			28-22-11	0.00641026
10-25.1-21.1	0.00641026	13-21-16-17	0.00641026	17-30-13	0.00641026
10-25.1-23	0.00641026	13-21-18-16	0.00641026	17-30-14	0.00641026
10-25.1-26	0.00641026	14-16-16-16	0.00641026	17-31-13	0.00641026
10-25.1-29	0.00641026	14-16-16-17	0.00641026	17-32-15	0.00641026
10-26.1-19	0.00641026	14-16-16-18	0.00641026	18-30-14	0.00641026
10-26.1-20	0.00641026	14-17-17-18	0.00641026	18-30.2-13	0.00641026
10-26.1-23	0.00641026	14-18-16-18	0.00641026	18-32-14	0.00641026
10-26.1-25	0.00641026	14-18-18-16	0.00641026	18-32.2-12	0.00641026
10-26.1-26	0.00641026	14-18-18-17	0.00641026	18-33.2-15	0.00641026
10-26.1-27	0.00641026	14-19-17-16	0.00641026	19-27-13	0.00641026
10-26.1-30	0.00641026	14-19-17-17	0.00641026	19-27.2-12	0.00641026
10-26.1-33	0.00641026	14-19-19-17	0.00641026	19-28-11	0.00641026
10-27.1-22	0.00641026	14-20-15-18	0.00641026	19-28-14	0.00641026
10-27.1-26	0.00641026	14-20-16-16	0.00641026	19-28.2-12	0.00641026
10-27.1-27	0.00641026	14-20-16-17	0.00641026	19-28.2-13	0.00641026
10-27.1-28	0.00641026	14-20-16-19	0.00641026	19-29.2-12	0.00641026
10-28.1-19	0.00641026	14-20-17-16	0.00641026	19-30-14	0.00641026
10-28.1-20	0.00641026	14-20-18-18	0.00641026	19-30-15	0.00641026
10-28.1-21	0.00641026	14-20-19-17	0.00641026	19-30.2-14	0.00641026
10-28.1-27	0.00641026	14-21-16-18	0.00641026	19-31.2-12	0.00641026
10-28.2-27	0.00641026	14-21-16-19	0.00641026	19-32-12	0.00641026
10-29.1-20	0.00641026	14-21-16.2-17	0.00641026	19-32.2-12	0.00641026
10-29.1-21	0.00641026	14-21-17-17	0.00641026	19-33-13	0.00641026
10-29.1-24	0.00641026	14-21-17.2-19	0.00641026	20-27.2-12	0.00641026
11-18-17	0.00641026	14-21-18-17	0.00641026	20-29.2-12	0.00641026
11-18.1-27	0.00641026	14-22-17-16	0.00641026	20-30.2-9	0.00641026
11-19-23	0.00641026	14-23-17-16	0.00641026	20-31-12	0.00641026
11-19-26	0.00641026	15-16-16-18	0.00641026	20-31.2-12	0.00641026
11-21-30	0.00641026	15-16-18-15	0.00641026	20-31.2-13	0.00641026
11-22.1-18	0.00641026	15-17-18-15	0.00641026	20-32-14	0.00641026
11-22.1-25	0.00641026	15-18-17-16	0.00641026	21-31-14	0.00641026
11-23.1-20	0.00641026	15-18-17-17	0.00641026
11-23.1-31	0.00641026	15-18-17-18	0.00641026
11-24-28	0.00641026	15-18-18-16	0.00641026
11-24.1-18	0.00641026	15-18-20-18	0.00641026
11-24.1-23	0.00641026	15-19-16-8.1	0.00641026
11-24.1-28	0.00641026	15-19-16.2-17	0.00641026
11-25.1-16	0.00641026	15-19-17-15	0.00641026
11-25.1-21	0.00641026	15-19-17-19	0.00641026
11-25.1-24	0.00641026	15-19-18-15	0.00641026
11-25.1-28	0.00641026	15-19-18-17	0.00641026
11-25.1-31	0.00641026	15-20-16-16	0.00641026
11-26.1-20	0.00641026	15-20-16-17	0.00641026
11-26.1-22	0.00641026	15-20-16-18	0.00641026
11-26.1-30	0.00641026	15-20-16.2-17	0.00641026
11-27.1-23	0.00641026	15-20-17-18	0.00641026
11-27.1-29	0.00641026	15-20-17-19	0.00641026
11-28.1-23	0.00641026	15-20-17.2-19	0.00641026
11-28.2-29	0.00641026	15-20-19-15	0.00641026
11-30.1-20	0.00641026	15-21-16-18	0.00641026
11-30.1-21	0.00641026	15-21-17-18	0.00641026
11-30.1-30	0.00641026	15-21-18-16	0.00641026
11-31.1-20	0.00641026	15-21-18-17	0.00641026
12-18-21	0.00641026	15-22-17-15	0.00641026
12-19-24	0.00641026	15-22-18-19	0.00641026
12-22-29	0.00641026	16-17-19-17	0.00641026
12-22.1-20	0.00641026	16-18-16-17	0.00641026
12-22.1-28	0.00641026	16-19-17-18	0.00641026
12-22.1-30	0.00641026	16-20-17-15	0.00641026
12-23.1-24	0.00641026	16-20-17-16	0.00641026
12-24.1-21	0.00641026	16-21-16-18	0.00641026
12-24.1-25	0.00641026	16-23-17-17	0.00641026
12-24.1-26	0.00641026	17-20-16-18	0.00641026
12-24.1-28	0.00641026	17-20-18-17	0.00641026
12-24.1-29	0.00641026
12-25.1-29	0.00641026
12-26.1-23	0.00641026
12-27.1-19	0.00641026
12-27.1-25	0.00641026
12-27.1-26	0.00641026
12-27.1-28	0.00641026
12-30.1-17	0.00641026
12-30.1-31	0.00641026
12-33.1-22	0.00641026
HD	0.99694	HD	0.994789	HD	0.98933	HD	0.958147	HD	0.972291	HD	0.960298	HD	0.948718
