# Supplementary material for: Genetic polymorphisms and forensic efficiency of 19 X-chromosomal STR loci for Xinjiang Mongolian population
Source: PeerJ. 2018 Jul 3;6:e5117. doi: 10.7717/peerj.5117 (PMC6034600; doi:10.7717/peerj.5117)
Supplement: Supplemental Information 5 [file peerj-06-5117-s005.xlsx]

## Sheet: Sheet1
Supplementary Table 5. The DA distances between the 15 Asian populations
	Xinjiang Mongolian	Inner Mongolian	Tibetan	Hui	Korla Uygur	Taiwanese	Ili Uygur	Xibe	Kazak	Japanese	Bhil	Malay	Guanzhong Han	Shanghai Han	Southern Han
Xinjiang Mongolian	0	0.051	0.07	0.057	0.061	0.054	0.066	0.061	0.055	0.05	0.078	0.061	0.052	0.054	0.055
Inner Mongolian	0.051	0	0.032	0.025	0.031	0.019	0.039	0.026	0.029	0.017	0.046	0.028	0.016	0.018	0.02
Tibetan	0.07	0.032	0	0.031	0.051	0.026	0.058	0.038	0.047	0.029	0.056	0.041	0.026	0.029	0.028
Hui	0.057	0.025	0.031	0	0.038	0.016	0.046	0.032	0.034	0.022	0.047	0.028	0.016	0.018	0.017
Korla Uygur	0.061	0.031	0.051	0.038	0	0.034	0.032	0.045	0.023	0.04	0.034	0.037	0.032	0.036	0.038
Taiwanese	0.054	0.019	0.026	0.016	0.034	0	0.041	0.026	0.03	0.013	0.042	0.019	0.009	0.011	0.012
Ili Uygur	0.066	0.039	0.058	0.046	0.032	0.041	0	0.052	0.033	0.049	0.043	0.042	0.04	0.042	0.044
Xibe	0.061	0.026	0.038	0.032	0.045	0.026	0.052	0	0.04	0.026	0.058	0.039	0.025	0.03	0.029
Kazak	0.055	0.029	0.047	0.034	0.023	0.03	0.033	0.04	0	0.032	0.041	0.033	0.028	0.032	0.037
Japanese	0.05	0.017	0.029	0.022	0.04	0.013	0.049	0.026	0.032	0	0.049	0.024	0.012	0.016	0.018
Bhil	0.078	0.046	0.056	0.047	0.034	0.042	0.043	0.058	0.041	0.049	0	0.041	0.042	0.045	0.044
Malay	0.061	0.028	0.041	0.028	0.037	0.019	0.042	0.039	0.033	0.024	0.041	0	0.024	0.023	0.023
Guanzhong Han	0.052	0.016	0.026	0.016	0.032	0.009	0.04	0.025	0.028	0.012	0.042	0.024	0	0.012	0.012
Shanghai Han	0.054	0.018	0.029	0.018	0.036	0.011	0.042	0.03	0.032	0.016	0.045	0.023	0.012	0	0.016
Southern Han	0.055	0.02	0.028	0.017	0.038	0.012	0.044	0.029	0.037	0.018	0.044	0.023	0.012	0.016	0
